# Supplementary material
Source: publisher figshare collection journal article supplement (https://gsajournals.figshare.com/articles/dataset/_/14444531)
Supplement: Supplementary file 1 [file 1]

## Sheet: Sheet1
Table S2. Strains Used in this Study.
Strains	Genotype	Source
Kfy501	h+ arg3D4 leu1-32 his3D ade6-DN/N	Wheeler et al. 2012
Kfy976	h+ arg3D clr4::leu2 leu1-32 his3D ade6DN/N	Wheeler et al. 2012
Wfy18	h- arg3D4 leu1-32 his3D ade6-DN/N	This study
Wfy23-25	h+ arg3D leu1-32 his3D ura4::ade6 ade6DN/N	This study; transformed Wfy18
Wfy30-32	h+ arg3D clr4::leu2 leu1-32 his3D ura4::RCE(1Rdg)-ade6 ade6DN/N	This study; transformed Kfy976
Wfy33-35	arg3D leu1-32 his3D ura4::RCE(1Rdg)-ade6 ade6DN/N	This study; Wfy30-32 crossed to Wfy18
Wfy232-234	h- arg3D leu1-32 his3D ura4::RCcons(1Rdg)-ade6 ade6DN/N	This study; transformed Wfy18
Wfy138-140	h- arg3D4 leu1-32 his3D ura4::RCE(1Rdg,ΔRCons)-ade6 ade6DN/N	This study; transformed Wfy18
Wfy112-114	h- arg3D leu1-32 his3D ura4::RCE(1Ldg)-ade6 ade6DN/N	This study; transformed Kfy976 crossed to Wfy18
Wfy63-65	arg3D leu1-32 his3D ura4::RCE(2Ldg) -ade6 ade6DN/N	This study; transformed Kfy976 crossed to Wfy18
Wfy48-50	arg3D leu1-32 his3D ura4::RCE(3Ldg) -ade6 ade6DN/N	This study; transformed Kfy976 crossed to Wfy18
Wfy60-62	arg3D leu1-32 his3D ura4::RCE(3Rdg) -ade6 ade6DN/N	This study; transformed Kfy976 crossed to Wfy18
Wfy66,67,80	arg3D leu1-32 his3D ura4::RCE(1Rdh) -ade6 ade6DN/N	This study; transformed Kfy976 crossed to Wfy18
Wfy68-70	arg3D leu1-32 his3D ura4::RCE(2LRdh) -ade6 ade6DN/N	This study; transformed Kfy976 crossed to Wfy18
Wfy71,81,133	arg3D leu1-32 his3D ura4::RCE(3LRdh) -ade6 ade6DN/N	This study; transformed Kfy976 crossed to Wfy18
Wfy187-189	h- arg3D leu1-32 his3D ura4::RCE(3Ldh)-ade6 ade6DN/N	This study; transformed Wfy18
Wfy190-192	h- arg3D leu1-32 his3D ura4::RCE(3Rdh)-ade6 ade6DN/N	This study; transformed Wfy18
Wfy174-176	h- arg3D4 leu1-32 his3D ura4::RCE(2LRdh 300 bases upstream)-ade6 ade6-DN/N	This study; transformed Wfy18

## Sheet: Sheet2
18	Wfy18
23	Wfy23
24	Wfy24
25	Wfy25
30	Wfy30
31	Wfy31
32	Wfy32
112	Wfy112
113	Wfy113
114	Wfy114
33	Wfy33
34	Wfy34
35	Wfy35
63	Wfy63
64	Wfy64
65	Wfy65
48	Wfy48
49	Wfy49
50	Wfy50
60	Wfy60
61	Wfy61
62	Wfy62
66	Wfy66
67	Wfy67
80	Wfy80
68	Wfy68
69	Wfy69
70	Wfy70
71	Wfy71
81	Wfy81
133	Wfy133
187	Wfy187
188	Wfy188
189	Wfy189
190	Wfy190
191	Wfy191
192	Wfy192
138	Wfy138
139	Wfy139
140	Wfy140
78	Wfy78
79	Wfy79
82	Wfy82
158	Wfy158
159	Wfy159
160	Wfy160
164	Wfy164
165	Wfy165
166	Wfy166
